# Supplementary material for: Higher waist circumference is associated with increased likelihood of female infertility: NHANES 2017-2020 results
Source: PubMed Central journal article supplement (PMC10627239; doi:10.3389/fendo.2023.1216413), 2023-10-20
Supplement: Table_1.pdf [file Table_1.pdf]

**TABLE S1** | Association of the categorical variable WC with infertility

|                     | OR(95%CI), p value       |                          |                          |
|---------------------|--------------------------|--------------------------|--------------------------|
|                     | Model 1 <sup>1</sup>     | Model 2 <sup>2</sup>     | Model 3 <sup>3</sup>     |
| Infertility         |                          |                          |                          |
| Waist Circumference | 1.02 (1.01, 1.02) <0.01  | 1.02 (1.01, 1.02) <0.01  | 1.02 (1.00, 1.03) <0.01  |
| Categories          |                          |                          |                          |
| Normal              | Reference                | Reference                | Reference                |
| Overweight          | 2.01 (1.11, 3.63) 0.0204 | 1.80 (0.99, 3.27) 0.0550 | 2.00 (0.94, 4.25) 0.0702 |
| Obese               | 2.38 (1.47,3.86) <0.01   | 2.06 (1.25, 3.39) <0.01  | 2.27(1.16, 4.45) 0.0165  |

Classification of WC into groups:Normal (< 80cm) ; Overweight (80 ~ 88cm) ; Obese (≥ 88cm)

OR, odds ratio; 95% CI, 95% confidence interval.

<sup>1</sup>Model 1: No covariates were adjusted.

<sup>2</sup>Model 2: Adjusted for age and race.

<sup>3</sup>Model 3: Adjusted for age, race, education level, Ratio of family income to poverty, marital status, Minutes sedentary activity, Meals from fast food or pizza place, Total Cholesterol, Direct HDL-Cholesterol, hypertension, and diabetes.
